# Supplementary material
Source: PubMed Central journal article supplement (PMC7007276)
Supplement: mp9b00535_si_001.pdf [file mp9b00535_si_001.pdf]

# Mucoadhesive electrospun patch delivery of lidocaine to the oral mucosa and investigation of spatial distribution in tissue using MALDI mass spectrometry imaging

Katharina H. Clitherow<sup>a</sup>, Craig Murdoch<sup>a</sup>, Sebastian Guy Spain<sup>b</sup>, Anna Mette Handler<sup>c</sup>, Helen E. Colley<sup>a</sup>, Mai Bay Stie<sup>c</sup>, Hanne Mørck Nielsen<sup>c</sup>, Christian Janfelt<sup>c\*\*</sup>, Paul V. Hatton<sup>a\*</sup>, Jette Jacobsen<sup>c</sup>

<sup>a</sup>School of Clinical Dentistry, 19 Claremont Crescent, University of Sheffield, Sheffield S10 2TA, UK

<sup>b</sup>Department of Chemistry, Brook Hill, University of Sheffield, Sheffield S3 7HF, UK

<sup>c</sup>Department of Pharmacy, 2 Universitetsparken, University of Copenhagen, DK-2100 Copenhagen, Denmark

\*Corresponding author: Prof. Paul Hatton, School of Clinical Dentistry, 19 Claremont Crescent, Sheffield, S10 2TA, UK

Email: *paul.hatton@sheffield.ac.uk*

\*\*Communicating author for MALDI-MSI: Dr. Christian Janfelt, Department of Pharmacy, 2 Universitetsparken, University of Copenhagen, DK-2100 Copenhagen, Denmark.

Email: *christian.janfelt@sund.ku.dk*

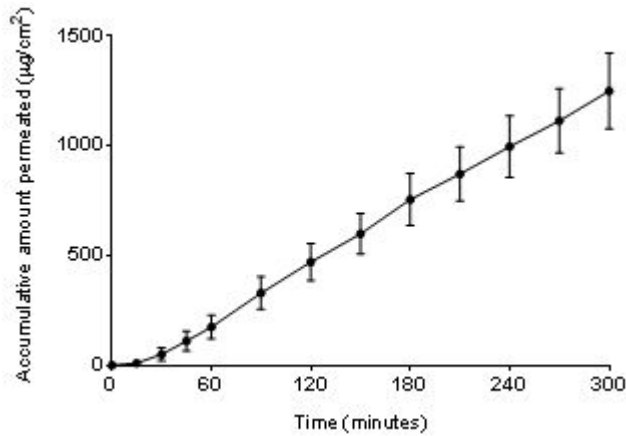

**Supplementary Figure 1.** Accumulative permeation of lidocaine applying 3% (w/v) lidocaine HCl in PBS through *ex vivo* porcine buccal mucosa. Data are mean  $\pm$  SD (n=4).

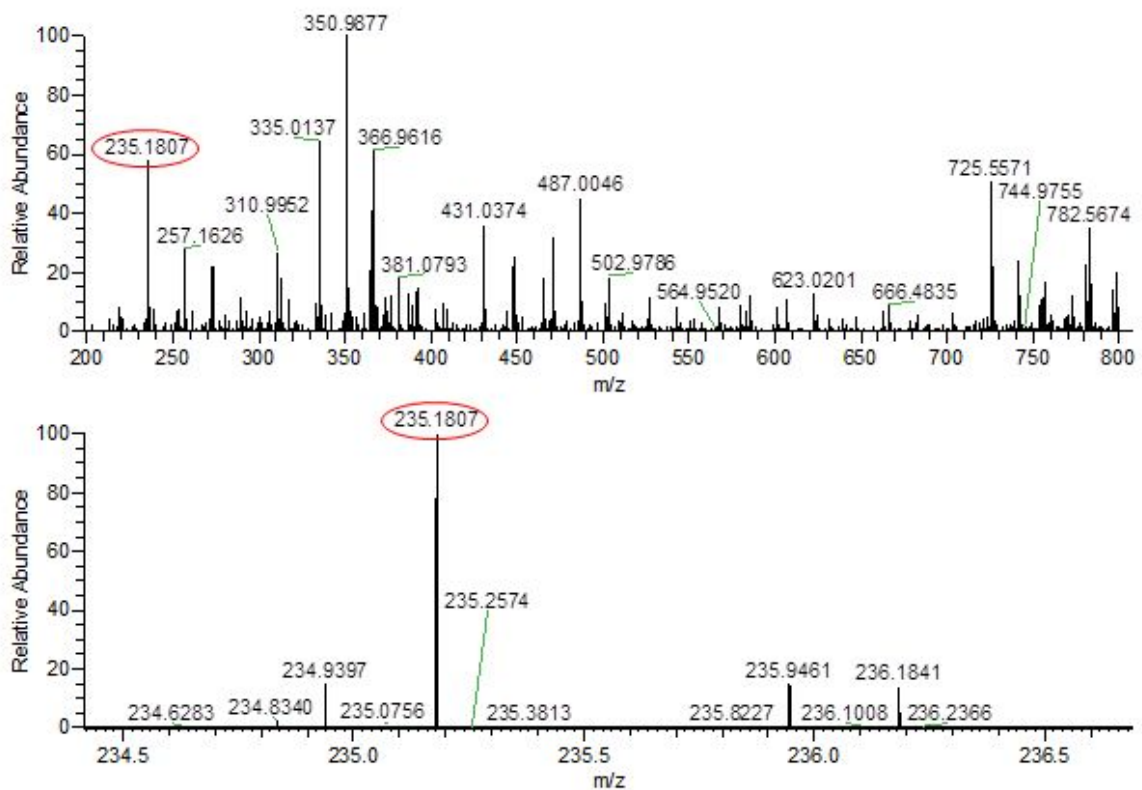

**Supplementary Figure 2.** Mass spectrum from the image in Figure 6 ( $t=3h$ ) averaged over 100 pixels in the tissue. As observed, lidocaine ( $m/z$  235.1807) – a major peaks in the mass spectrum – was detected very close to its theoretical mass of 235.1805, corresponding to a mass accuracy of 1.0 ppm. The bottom spectrum is the same data, zoomed to a smaller mass range, showing the width of the

lidocaine peak. The extremely narrow peak width provides a very high selectivity and thus minimizes the risk of interferences with endogenous compounds and signals from the MALDI matrix.

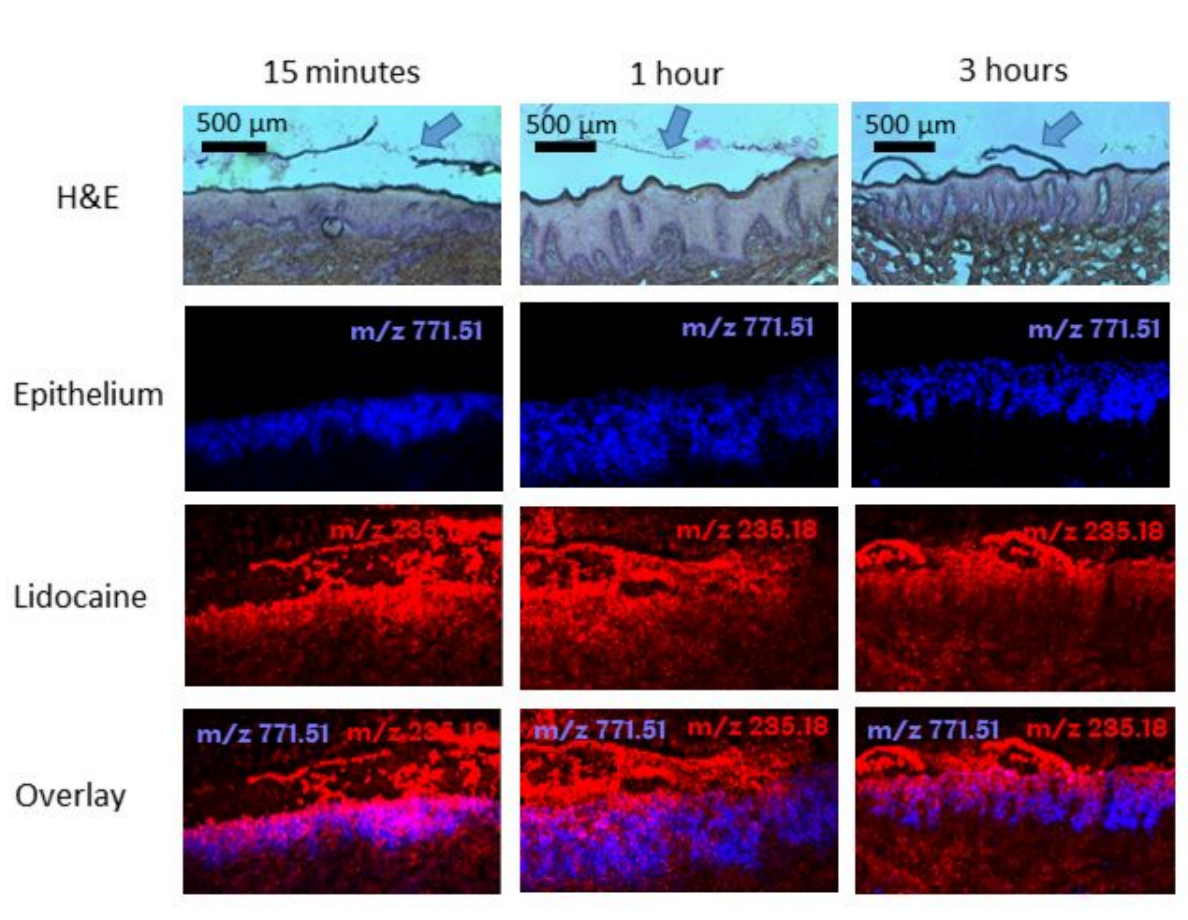

**Supplementary Figure 3.** Hematoxylin and eosin (H&E) stained tissue sections and corresponding MALDI-MS images of porcine buccal mucosa exposed to dual-layer electrospun patches containing 3% (w/v) lidocaine base ( $m/z$  235.1805  $[M+Na]^+$ ; red) after 15 min, 1 h and 3 h. The epithelium (blue) for each sample is shown using the epithelial marker PG (34:1) ( $m/z$  771.5140  $[M+Na]^+$ ). The arrows in the H&E images show the position of the electrospun patch.
